# Supplementary material
Source: PubMed Central journal article supplement (PMC7087020)
Supplement: 705_2016_2983_MOESM1_ESM.pdf [file 705_2016_2983_MOESM1_ESM.pdf]

**Supplementary Materials.** 26 primer pairs were used for amplified the full-length genome sequences of porcine deltacoronavirus

| Primers          | Primer sequence (5'-3')        | Sizes (bp) |
|------------------|--------------------------------|------------|
| PDCoV_ORF1ab1_F  | ACATGGGGACTAAAGATAAAAAATTATAGC | 1044       |
| PDCoV_ORF1ab1_R  | TCGTGTCAGCAAGAGATGTACCA        |            |
| PDCoV_ORF1ab2_F  | AGGACAAGGAAGCTTGCTGAGTTAGC     | 1141       |
| PDCoV_ORF1ab2_R  | GCCTTATTGAGTATCTTAGTAGTTGCC    |            |
| PDCoV_ORF1ab3_F  | CAATTTACACTGTTGGTAATCGCATGC    | 1084       |
| PDCoV_ORF1ab3_R  | GCAGGTGTTACTGGTACTATAGG        |            |
| PDCoV_ORF1ab4_F  | CAGGCTGTTGAAGACAAACCTTCTGATA   | 1124       |
| PDCoV_ORF1ab4_R  | GTCTTCAGGTAGACGCAGTATTGCTG     |            |
| PDCoV_ORF1ab5_F  | AGAACCAAGCCAAGGAAGCTTGACC      | 1193       |
| PDCoV_ORF1ab5_R  | GGCATTGTAATTACAAGGCCAGCC       |            |
| PDCoV_ORF1ab6_F  | GCTTAATTCAGGCTATACAATTGGCAC    | 1047       |
| PDCoV_ORF1ab6_R  | CCATTGGTCGCTTGCTTAATGTCTG      |            |
| PDCoV_ORF1ab7_F  | GCTTCTCGTATTGAGAAGTATTACCC     | 1100       |
| PDCoV_ORF1ab7_R  | ACAAGATCACCATTAATGTCAATAGCC    |            |
| PDCoV_ORF1ab8_F  | CAGGACACTAGACAACTCTATTGC       | 1189       |
| PDCoV_ORF1ab8_R  | GACACTTGACTATAAAGTCGCGGCA      |            |
| PDCoV_ORF1ab9_F  | ATTGGAAAATTCCGTGGTGACCAGTG     | 1108       |
| PDCoV_ORF1ab9_R  | CAGTGTAACCATACAGTCGCTGAGC      |            |
| PDCoV_ORF1ab10_F | TGGATACCGAACACATTTCTGCGCAC     | 1034       |
| PDCoV_ORF1ab10_R | CATTCCGCCTTTGCAATGTAAACAGC     |            |
| PDCoV_ORF1ab11_F | ACGATCTGTTGAGATGAACGAATCTC     | 1179       |
| PDCoV_ORF1ab11_R | CAAGAAGTGCATGGCTCATGAGTC       |            |
| PDCoV_ORF1ab12_F | ATCCTGGTGTTGATGGACGGTGC        | 1062       |
| PDCoV_ORF1ab12_R | TCTGGACATTCAACAGTGTTAGGATG     |            |
| PDCoV_ORF1ab13_F | CCCCTTGAGTATGATGGATTTTCAGT     | 1091       |
| PDCoV_ORF1ab13_R | GCATGTTTGGCATAGAACGATCACAC     |            |
| PDCoV_ORF1ab14_F | CCAAATTCTATGGTGGTTGGGACAA      | 1082       |
| PDCoV_ORF1ab14_R | TCGACGAATGCAATCACCACAGCG       |            |

|                  |                             |      |
|------------------|-----------------------------|------|
| PDCoV_ORF1ab15_F | GCTCAGATGTATGAGCAAAGTCCTAC  | 1111 |
| PDCoV_ORF1ab15_R | TGATAGTCGAGAAGATATACTGTGCAG |      |
| PDCoV_ORF1ab16_F | TACCCACACGTACAACCTGTTGAGTGC | 1071 |
| PDCoV_ORF1ab16_R | TGCCGATCCAACCTCTGAACATAGGTG |      |
| PDCoV_ORF1ab17_F | ATCCACACTTGGGTTTCTTCCATCAC  | 1191 |
| PDCoV_ORF1ab17_R | CAATAGGCTGTTCACTACTACAATCTG |      |
| PDCoV_ORF1ab18_F | TCAACTTGGCTCCACTCATCTACTAC  | 1115 |
| PDCoV_ORF1ab18_R | GGCATGTGCTTGTCTTATGATGTCAAT |      |
| PDCoV_ORF1ab19_F | CACCTAACGCAAGCTCCAAGAACG    | 1198 |
| PDCoV_ORF1ab19_R | GGTAGCCAGGAAGAACGCCAACA     |      |
| PDCoV_S1_F       | ATGCAGAGAGCTCTATTGATTATGACC | 961  |
| PDCoV_S1_R       | CTTCGCCAAAATCCATGTGTGCAG    |      |
| PDCoV_S2_F       | CAATAGCATGCCAGCGCTCTTCTCA   | 923  |
| PDCoV_S2_R       | TGGTATTTCAACTTCGCCATCGTATAG |      |
| PDCoV_S3_F       | CATCCACATTACAGAATACTCGAC CA | 979  |
| PDCoV_S3_R       | TGAGTAACATATGCATTAAGTGCAGC  |      |
| PDCoV_S4_F       | CATTATCACACCTGACTGCACAGCT   | 1005 |
| PDCoV_S4_R       | CTACCATTTCCTTAAACTTAAAGGACG |      |
| PDCoV_EM_F       | AAGGTATACCGACGACCAACCAACAC  | 962  |
| PDCoV_EM_R       | CTGCAGATGGCAGTTGCACATTACAT  |      |
| PDCoV_Nsp6N_F    | AGAAATCCGCCACAGGATATGGT     | 928  |
| PDCoV_Nsp6N_R    | GAAGGGGTCAACTCTGAAACCTTG    |      |
| PDCoV_NNsp7_F    | GGTTCGGGAGCTGACACTTCTATTAA  | 1121 |
| PDCoV_NNsp7_R    | GCTCCATCCCCCTATAAGCCAA      |      |
